39 mRNAs, proteins), while the edges represent relations between these objects (e.g. gene co-expression,  
40 or binding between two proteins). Different approaches can be used to reconstruct biological networks.  
41 Here, we focus on data-driven methods, which infer networks from gene expression data with the help  
42 of reverse engineering techniques (Sonawane et al., 2019).

43 Network inference algorithms were first proposed to extract information from bulk gene expression  
44 data, and their development has been an active area of research for more than 20 years (Barabási et al.,  
45 2011; Verny et al., 2017; Sonawane et al., 2019; Silverman et al., 2020). With the advent of single-cell  
46 RNA sequencing (scRNA-seq), we started to gather transcriptomic data from individual cells, enabling  
47 proper studies of their heterogeneity. However, the analysis of scRNA-seq data comes with a variety  
48 of computational challenges (e.g. small number of sequencing reads, systematic noise due to the  
49 stochasticity of gene expression at single-cell level, dropouts) that distinguish this data type from its  
50 bulk counterpart. For this reason, network inference methods originally developed for bulk gene  
51 expression data may not be suitable for data generated from single cells. The development of network  
52 inference algorithms has thus recently undergone a strong shift towards the design of methods targeting  
53 single-cell data (Fiers et al., 2018).

54 Two benchmarks of single-cell network inference methods have been published (Chen and Mar, 2018;  
55 Pratapa et al., 2020). Both works evaluate network inference algorithms by comparing the inferred  
56 network with a ground-truth. These works are also mostly focused on simulated data and they apply a  
57 strong filtering on genes (leaving only 100-1,000 genes for network inference). Chen et al. (Chen and  
58 Mar, 2018) considered five methods targeting bulk data and three methods specifically designed for  
59 single-cell data. More recently, Paratapa et al. (Pratapa et al., 2020) focused on twelve methods  
60 designed for single-cell data. Both benchmarks concluded that the overall performances of all methods  
61 were quite disappointing, and that network inference remains a challenging problem.

62 Here, we evaluate network inference algorithms based on their reproducibility, i.e. their ability to infer  
63 similar networks once applied to two independent datasets for the same biological condition (e.g. two  
64 independent scRNA-seq datasets of colorectal cancer). The rationale behind this comparison is that, if  
65 the two independent datasets are profiled from the same biological condition (e.g. colorectal cancer)  
66 involving the same cell types, we can expect that the regulatory programs underlying them should  
67 strongly overlap. As a consequence, a good network inference algorithm should infer highly  
68 overlapping networks when applied to single-cell datasets profiled from the same biological condition.  
69 Starting from the work of Paratapa et al., we selected the four algorithms that do not require an ordering  
70 of the cells according to pseudo-time and we tested the reproducibility of the inferred networks in three  
71 biological systems: human retina, T-cells in colorectal cancer and human hematopoiesis. Differently  
72 from previous benchmarks, we only applied a soft filtering on genes, thus testing the algorithms based  
73 on their performances to infer networks involving from 6000 to 12000 nodes/genes.

74 From our benchmark, GENIE3 emerges as the most reproducible network inference algorithm.  
75 Interestingly this performance is not influenced by the single-cell sequencing platform, the cell type  
76 annotation system, the number of cells constituting the single-cell dataset, or the thresholding applied  
77 to the links of the inferred networks. In order to ensure the reproducibility and ease extensions of this  
78 benchmark study, we implemented all the analyses in a Jupyter notebook, called scNET and available  
79 at <https://github.com/ComputationalSystemsBiology/scNET>.

80

## 81 **2 Materials and Methods**

## 82 2.1 Single-cell network inference algorithms benchmarked

83 Starting from the exhaustive collection of single-cell network inference algorithms presented in  
84 (Pratapa et al., 2020), two main categories of methods can be distinguished. Some methods interpret  
85 scRNA-Seq as time-course expression data, where the pseudo-time corresponds to the time  
86 information. These methods are frequently based on Ordinary Differential Equations (ODEs) and are  
87 relevant for biological systems undergoing dynamic transcriptional changes (e.g. scRNA-Seq  
88 performed on differentiating cells) (Matsumoto et al., 2017). In contrast, other methods do not use  
89 pseudo-time information to infer networks. These methods generally use statistical measures (e.g.  
90 correlation, mutual information) to infer regulatory connections and are thus better suited for  
91 transcriptomic data not affected by strong dynamical processes (e.g. retina cells in normal state).

92 Testing reproducibility strictly requires the availability of two independent scRNA-seq datasets  
93 reflecting the same biological condition and presenting as few as possible technical variations. Indeed,  
94 the presence of technical variations due to the sequencing or experimental procedures could drastically  
95 impact the conclusions of our work. In this respect, finding independent scRNA-seq datasets reflecting  
96 dynamic transcriptional changes, generated with the same experimental procedure, is really  
97 challenging. We thus decided to focus our benchmark study on network inference methods that do not  
98 use the pseudo-time information. Four single-cell network inference methods are thus considered in  
99 this evaluation: GENIE3 (Huynh-Thu et al., 2010), GRNBoost2 (Moerman et al., 2019), PIDC (Chan  
100 et al., 2017) and PPCOR (Kim, 2015). Of note, the first three algorithms are also the best performing  
101 in the benchmark of Pratapa et al.

102 Gene Network Inference with Ensemble of Trees (GENIE3) (Huynh-Thu et al., 2010) is a tree-based  
103 network inference method. For each gene  $G_1$  in the expression dataset, GENIE3 solves a regression  
104 problem, determining the subset of genes whose expression is the most predictive of the expression of  
105  $G_1$ . This method was the best performing algorithm in the DREAM4 In Silico Multifactorial challenge  
106 (Greenfield et al., 2010). GENIE3 requires in input the scRNA-seq expression matrix and a list of  
107 Transcription Factors (TFs). In our tests the list of human TFs provided in input corresponds to the  
108 intersection between the expressed genes and those annotated as encoding TFs by (Chawla et al., 2013).  
109 The output of GENIE3 is a weighted network linking TFs with predicted target genes. The weight  
110 associated with each link corresponds to its Importance Measure (IM), which represents the weight  
111 that the Transcription Factor has in the prediction of the level of expression of the target gene. No post  
112 processing threshold has been applied to the inferred links.

113 GRNBoost2 (Moerman et al., 2019) has been developed as a faster alternative to GENIE3. It is thus  
114 based on a regression model, using a stochastic gradient boosting machine regression. The inputs and  
115 outputs of GRNBoost2 are the same as for GENIE3, and no post processing threshold has been applied  
116 to the inferred links. Both GRNBoost2 and GENIE3 are part of the SCENIC workflow (Aibar et al.,  
117 2017).

118 PPCOR (Kim, 2015) infers the presence of a regulatory interaction between two genes by computing  
119 the correlation of their expression patterns. To control for possible indirect effects, partial correlation  
120 is used instead of a simple correlation, where partial correlation is a measure of the relationship between  
121 two variables while controlling for the effect of other variables. The only input of PPCOR is the  
122 expression matrix. The output of PPCOR is a weighted network, where all links are weighted based on  
123 the partial correlation between the expression values of the linked nodes/genes. The network produced  
124 by PPCOR is complete, i.e. all nodes are connected with all. We thus had to filter the links of the

125 inferred network based on the significance of the correlation values associated to the links (P-value  
126 threshold 0.05).

127 Partial Information Decomposition and Context (PIDC) (Chan et al., 2017) is based on concepts from  
128 information theory and uses partial information decomposition (PID) to identify potential regulatory  
129 relationships between genes. The only input of PPCOR is the expression matrix and its output is a  
130 weighted gene-gene network.

## 131 **2.2 Data acquisition and preprocessing**

132 Fourteen public scRNA-seq datasets have been used for this benchmark: Menon and Lukowski  
133 obtained by profiling human retina cells; Zhang and Li profiling T-cells in colorectal cancer (CRC); Hay  
134 and Setty profiling human hematopoiesis cells. See Table 1 for a complete description of these datasets.  
135 The hematopoiesis datasets were split according to their cell type of origin. Only those cell types  
136 reported in both studies by Hay et al. and Setty et al. were considered. We thus obtained a total of 10  
137 scRNA-seq datasets in hematopoiesis spanning five cell types: HSC, CLP, Monocyte, Erythroblast and  
138 Dendritic Cell.

139 After downloading the data, we filtered the genes based on their total count number ( $< 3 * 0.01 * \text{number}$   
140 of cells), as well as on the number of cells in which they are detected ( $> 0.01 * \text{number}$  of cells), as  
141 described in (Aibar et al., 2017). The gene filtering is performed on each dataset independently. Then,  
142 for each biological condition (CRC T-cells, retina, hematopoiesis), only the genes retained for both  
143 datasets were selected for network inference. The number of genes retained after filtering are reported  
144 in the last column of Table 1. Finally, the data were log<sub>2</sub>-normalised before applying the different  
145 network inference algorithms.

## 146 **2.3 Indexes employed to measure the reproducibility of the network inference algorithms**

147 Percentage of intersection (perINT) and Weighted Jaccard Similarity (WJS) have been employed here  
148 to test the reproducibility of the network inference algorithms. The percentage of intersection is used  
149 to detect the presence of links shared between two compared networks, while WJS takes into account  
150 the similarity of the weights associated with the links shared between the compared networks.

151 Given two networks N1 and N2 inferred respectively from scRNAseq datasets D1 and D2, and  
152 indicating as  $|N|$  the number of links in the network N, the percentage of intersection (perINT) is  
153 computed as:

$$154 \text{ perINT}(N1, N2) = \frac{|N1 \cap N2|}{\min(|N1|, |N2|)},$$

155 while the Weighted Jaccard Similarity (WJS) (Tantardini et al., 2019), is defined as

$$156 \text{ WJS}(N1, N2) = \frac{\sum_{i=1}^{|N|} \min(w_i^1, w_i^2)}{\sum_{i=1}^{|N|} \max(w_i^1, w_i^2)},$$

157 where  $w^1, w^2$  are the vectors of weights associated with the links in common between N1 and N2.

158 In addition, to compare the inferred links to a ground-truth, we also considered a RcisTarget score  
159 derived from the application of the RcisTarget tool (Aerts et al., 2010; Aibar et al., 2017). Given a  
160 network of TF-gene interaction, RcisTarget predicts candidate target genes of a TF by looking at the  
161 DNA motifs that are significantly over-represented in the surroundings of the Transcription Start Site

162 (TSS) of all the genes that are linked to the TF. We here consider the links validated by RcisTarget as  
163 ground-truth and we compare them with the inferred networks, by computing:

$$164 \quad RcisTarget \text{ score}(N1) = \frac{\text{number of links present in } N1 \text{ and validated by RcisTarget}}{|N1|}.$$

165 In the case of the methods inferring links between all genes, a selection of links connecting TFs with  
166 possible target genes is performed before computing the RcisTarget score.

## 167 **2.4 Testing if the number of links in the networks affects our reproducibility score**

168 The number of links inferred by the network inference algorithm can affect our reproducibility tests.  
169 For example, in the extreme case of a method inferring complete networks, the perINT score would be  
170 100%. To test whether our results were affected by the number of links inferred by the different  
171 methods, we constructed a null model. Starting from the two networks inferred in a given biological  
172 condition (e.g. human retina), we randomly reshuffled the links of the two networks independently and  
173 tested the reproducibility scores. The reshuffling of the links in GENIE3 and GRNBoost2 was realized  
174 taking into account the different roles played by TFs and the other genes in the network. After repeating  
175 this procedure 10,000 times, we could verify the positioning of the real reproducibility scores with  
176 respect to the distribution obtained with the null model, and thereby assign p-values to the scores.

177

## 178 **3 Results**

179 Starting from the work (Pratapa et al., 2020) we selected the four single-cell network inference  
180 algorithms that do not require an ordering of the cells according to pseudo-time (GENIE3, GRNBoost2,  
181 PPCOR and PIDC, see Materials and Methods) and we evaluated them based on their reproducibility,  
182 i.e. their ability to infer similar networks once applied to two independent datasets from the same  
183 biological condition (e.g. two independent scRNA-seq datasets of colorectal cancer). The  
184 reproducibility is measured based on Percentage of intersection (perINT) and Weighted Jaccard  
185 Similarity (WJS) (see Materials and Methods). In addition, we computed the intersection with a  
186 ground-truth, based on the RcisTarget score (see Materials and Methods). The evaluation is repeated  
187 across three biological conditions: human retina, T-cells in colorectal cancer and human hematopoiesis,  
188 for a total of fourteen independent scRNAseq datasets. See Figure 1 for an overview of the benchmark  
189 workflow.

190 While in previous benchmarks (Chen and Mar, 2018; Pratapa et al., 2020) a low number of highly  
191 variable genes had been taken into account (100-1000 genes), we here tested the ability of the  
192 algorithms to infer networks involving all expressed genes (see Materials and Methods for details on  
193 the procedure used to filter genes). Indeed, filtering only the top 100-1,000 varying genes is a strong  
194 limitation. Restricting the nodes of the inferred network to a low number of genes is reasonable when  
195 a manually curated list of relevant genes is available (for example marker genes identified by wet-lab  
196 experiments). However, when such a list is not available, working only with the top 100-1000 varying  
197 genes may overlook genes and interactions playing a key role in the regulatory programs of the  
198 biological system. We thus tested the various network inference algorithms once applied to scRNAseq  
199 datasets containing 6,000-11,000 genes.

200 In our test cases, PIDC failed to reconstruct the networks for two main reasons: (i) the algorithms was  
201 slow, especially in the discretization step required to infer the network, and (ii) the use of multivariate



202 information measures impose to have a number of genes much lower than the number of cells, thus  
203 requiring to drastically filter out the starting set of genes. Overall, PIDC thus resulted to be more  
204 adequate to infer small networks (100-1,000 nodes/genes), which are not the focus of this work.

### 205 **3.1 Reproducibility in human retina**

206 We applied GENIE3, GRNBoost2 and PPCOR to two independent scRNA-seq datasets of human  
207 retina, reported in (Menon et al., 2019) and in (Lukowsk et al., 2019) (see Materials and Methods).  
208 After filtering, the two datasets span 6,212 common genes across a comparable number of cells: 20,091  
209 in Menon versus 20,009 in Lukowski.

210 We thus inferred a total of six networks. Of note, similar network sizes were obtained across the three  
211 network inference algorithms and across datasets, encompassing approximately one million links each  
212 (see Supplementary Table 1 for details). We then evaluated the reproducibility of each algorithm by  
213 computing the Percentage of intersection (perINT) and the Weighted Jaccard Similarity (WJS) between  
214 the networks inferred independently from the two datasets. The percentage of intersection is intended  
215 to test the amount of common links between the two networks, while the WJS takes also into account  
216 the similarity of the weights associated with the common links.

217 As shown in Figure 2A, GENIE3 is the algorithm showing the highest reproducibility according to  
218 both indexes, with a perINT reaching 100% and a WJS at 0.67. Our null model confirms that these  
219 results are not affected by the number of inferred links (see Materials and Methods for further details  
220 and Supplementary Table 2 for the corresponding P-values). At the same time, in agreement with the  
221 results of the previous benchmarks, the intersection with the ground true considered remains rather  
222 low, with RcisTarget scores ranging within 0-1.9%.

### 223 **3.2 Reproducibility in colorectal cancer (CRC) T-cells**

224 We further tested the performances of GENIE3, GRNBoost2 and PPCOR in colorectal cancer (CRC)  
225 T-cells. The two datasets used in this case are taken from (Zhang et al., 2019) and (Li et al., 2017) (see  
226 Materials and Methods), restricting the last dataset to only T-cells (see Materials and Methods). After  
227 filtering, we obtained datasets composed of 11,242 common genes and a widely varying number of  
228 cells: 10,805 for Zhang and 35 for Li.

229 Applying GENIE3, GRNBoost2 and PPCOR independently to the two datasets, we observe a high  
230 variability in the number of inferred links, which tend to be much lower in Li et al. compared to Zhang  
231 et al., presumably due to the high difference in the number of cells profiled in the two datasets (see  
232 Supplementary Table 2 for details). At the same time, variations across algorithms could be also  
233 observed, with GENIE3 inferring the highest number of links (three million and six million in Li and  
234 Zhang, respectively). Of note, PPCOR has been excluded from this comparison, as it produced partial  
235 correlation values outside the range  $[-1;1]$  for the Li et al. dataset.

236 After computation of the perINT and WJS (Figure 2B), GENIE3 emerged as the best performing  
237 method, with a perINT of 99.9% and a WJS of 0.25. Our null model confirms that these results are not  
238 affected by the higher number of links inferred by GENIE3 (see Materials and Methods for further  
239 details and Supplementary Table 2 for the corresponding P-values). Also, in this case, the RcisTarget  
240 score reflecting the intersection with a ground-truth is quite low (3.1-3.6%). Of note, despite the low  
241 number of cells reported by Li, the RcisTarget score obtained in this dataset is comparable with those  
242 obtained in networks inferred from much larger datasets.

### 243 **3.3 Reproducibility in human Hematopoiesis**

244 Human hematopoiesis has been used as the third biological context for the comparison of GENIE3,  
245 GRNBoost2 and PPCOR. The hematopoiesis datasets were split according to the different cell types  
246 profiled: HSC, CLP, Monocyte, Erythroblast and Dendritic Cell, obtaining a total of 10 scRNA-seq  
247 datasets. Networks were thus inferred on each cell type independently with GENIE3, GRNBoost2 and  
248 PPCOR, resulting in a total of 30 networks. Also, in this case, GENIE3 led to the highest number of  
249 links (approximately 2 million in all cell types), while GRNBoost2 and PPCOR led to numbers of links  
250 varying from 700 thousands to one million (see Supplementary Table 1). As for CRC T-cells, PPCOR  
251 produced networks composed of links with partial correlation higher than 1 and/or lower than -1 for  
252 some CLPs, and Monocytes. For this reason, we did not consider PPCOR in the reproducibility  
253 evaluation for these cell types.

254 The reproducibility was then tested for each cell type using the perINT and WJS indexes (Figure 2C-  
255 D). Here also, GENIE3 displayed the best performances with percentages of intersection reaching 97-  
256 100% and WJS at 0.5-0.66. Our null model confirms that these results are not affected by the higher  
257 number of links inferred by GENIE3 (see Materials and Methods for further details and Supplementary  
258 Table 2 for the obtained P-values). Consistently with previous observations, the RcisTarget scores  
259 remains low (3.5-4.3%) for all cell types and all methods (Figure 2E).

### 260 **3.4 Stability with respect to link thresholding in the inferred networks**

261 All the networks inferred by GENIE3, GRNBoost2 and PPCOR could be thresholded based on the  
262 distribution of the weights associated with their links. In the results presented above, the networks  
263 inferred with GENIE3 and GRNBoost2 did not undergo any filtering, given that these tools already  
264 perform a selection on the links. In contrast, the networks obtained with PPCOR are complete (i.e.  
265 everything is connected with everything), calling for a filtering of the links, which was done based on  
266 the significance of the correlation values (see Materials and Methods).

267 To test if more stringent filtering could alter our conclusions regarding the reproducibility of the  
268 benchmarked methods, we filtered the links of the inferred networks based on the distribution of the  
269 weights of these links. For all network inference methods, we imposed three thresholds on the weight  
270 distribution of the links, retaining the 40th, 80th and 90th percentiles. After thresholding, the  
271 intersection between the networks inferred on independent datasets from the same biological condition  
272 were evaluated, using the perINT and WJS as above.

273 As shown in Figure 3, the performances of all network inference methods tend to decrease when the  
274 threshold is increased, suggesting that the weight of the links is not a good proxy for their  
275 reproducibility. Overall, GENIE3 remains the best performing method independently on the threshold  
276 employed.

### 277 **3.5 Stability with respect to technical variations in the input data: number of profiled cells, 278 sequencing platform and cell type annotation**

279 In the experiments performed above, we tested the reproducibility of the network inference algorithms  
280 by using two independent datasets for each biological condition (e.g. human retina). A limitation of  
281 this approach comes from the technical differences between the protocols followed to generate these  
282 datasets: different sequencing platforms, different procedures used for the annotation of the cell types,  
283 and different number of cells. All these technical differences could impact our results.

284 To evaluate the stability of the results against technical variations, we used the largest dataset, from  
285 (Menon et al., 2019), encompassing 20,091 cells. We splitted this dataset into two subsets, keeping the  
286 proportions of the various cell types constant. We then applied the three network inference algorithms  
287 independently to the two subsets and we evaluated the reproducibility of the algorithms using perINT  
288 and WJS, as in the previous tests. To further assess the effect of the number of cells on network  
289 inference, we split the same scRNAseq dataset generated by Menon et al. three times to obtain couples  
290 of datasets encompassing decreasing number of cells: 100,000, 1,000 and 100. Note that for all these  
291 comparisons, the sequencing platform and/or the method/technique used to annotate the cells are  
292 identical for all subsets

293 PPCOR inferred networks for 100,000 and 1,000 cells, but failed at 100 cells by displaying correlation  
294 values outside the range [-1;1] (see Supplementary Table 3). In addition, as shown in Figure 4, GENIE  
295 3 emerged again as the best performing method in all cases. Of note, when varying the number of cells  
296 in the input data, the percentage of intersection and the number of links barely vary (see Figure 4 and  
297 Supplementary Table 3), while the WJS decreases more drastically (from 0.8 to 0.3 for GENIE3).

### 298 **3.6 The scNET Jupyter notebook**

299 To foster the reproducibility of all the results and figures presented in this study, we implemented the  
300 corresponding code in a Jupyter notebook available at  
301 <https://github.com/ComputationalSystemsBiology/scNET> together with the associated Conda  
302 environment containing all the required libraries installed. Importantly, scNET can be used to  
303 benchmark new network inference algorithms based on their reproducibility, or further test GENIE3,  
304 PPCOR and GRNBoost2 on user-provided datasets.

305

## 306 **4 Discussion**

307 Starting from the benchmark of Paratapa et al., we evaluated the network inference algorithms from a  
308 complementary perspective by assessing their reproducibility. We were thus interested to test if the  
309 algorithms would infer the same network once applied to pairs of independent datasets from the same  
310 biological condition (e.g. T-cells in colorectal cancer). Our benchmark focused on real patient-derived  
311 data spanning three biological contexts: human retina, T-cells in CRC, and human hematopoiesis cells.  
312 We thus span highly different biological contexts, going from cancer tissue, to isolated healthy immune  
313 cells, and to a mixture of normal retina cells combined in a single dataset. Importantly, we aimed at  
314 inferring networks involving a much higher number of genes compared to previous works.

315 In agreement with previous benchmarks, all network inference algorithms generated networks having  
316 low intersections with ground-truth. Of note the ground-truth considered here, based on RcisTarget, is  
317 different and complementary to those used in previous benchmarks. This disappointing result might  
318 arise for different reasons, potentially adding up. Limitations can be present in the input data, as  
319 scRNAseq may not provide sufficient resolution for reliable network inference. Turning to the  
320 inference algorithm, limitations may arise from underlying statistical assumptions. Finally, the ground-  
321 truth network considered here and in previous benchmarks may not be sufficiently comprehensive.

322 GENIE3 consistently generated the most reproducible results across all the three biological contexts  
323 considered. Furthermore, its performances proved to be stable with respect to the single-cell  
324 sequencing platform, the cell type annotation system, the number of cells considered as well as with  
325 respect to the thresholding applied to the links of the inferred networks. PPCOR provided values



326 outside the normal range of correlation values ( $[-1,1]$ ) for datasets having less than 1000 cells. Such  
327 inconsistencies are likely due to numerical problems arising when the input dataset encompasses many  
328 more genes than cells.

329 The main limitation of this benchmark is the number of considered network inference algorithms.  
330 Future extensions of this study could include pseudotime-based network inference methods, once  
331 adequate datasets will become available. To date, available independent datasets relevant for  
332 pseudotime-based network inference algorithms (e.g. cells profiled during development stimulation)  
333 present too many experimental variations to be employed for a reliable evaluation of reproducibility.  
334 Of note, such extensions will be greatly facilitated by taking advantage of the Jupyter notebook  
335 (scNET) provided as supplementary material.

### 336 **Conflict of Interest**

337 *The authors declare that the research was conducted in the absence of any commercial or financial*  
338 *relationships that could be construed as a potential conflict of interest.*

### 339 **Author Contributions**

340 LC designed the analysis. YK performed the analysis. LC and DT co-supervised the study. All  
341 authors contributed to the manuscript and approved the submitted version.

### 342 **Acknowledgments**

343 We thank the bioinformatics platform of IBENS for the computational/infrastructural support. We  
344 thank Michael Mason, Anaïs Baudot and Sabine Tejpar for the scientific feedbacks on the work.

### 345 **Data Availability Statement**

346 The datasets for this study can be accessed from their associated publications (see Table1). All the  
347 analyses are reproducible using the scNET Jupyter notebook available at  
348 <https://github.com/ComputationalSystemsBiology/scNET>.

### 349 **References**

- 350 Aerts, S., Quan, X.-J., Claeys, A., Naval Sanchez, M., Tate, P., Yan, J., et al. (2010). Robust target  
351 gene discovery through transcriptome perturbations and genome-wide enhancer predictions in  
352 *Drosophila* uncovers a regulatory basis for sensory specification. *PLoS biology* 8, e1000435.  
353 doi:10.1371/journal.pbio.1000435.
- 354 Aibar, S., González-Blas, C. B., Moerman, T., Huynh-Thu, V. A., Imrichova, H., Hulselmans, G., et  
355 al. (2017). SCENIC: single-cell regulatory network inference and clustering. *Nature Methods*  
356 14, 1083–1086. doi:10.1038/nmeth.4463.
- 357 Barabási, A.-L., Gulbahce, N., and Loscalzo, J. (2011). Network medicine: a network-based  
358 approach to human disease. *Nat. Rev. Genet.* 12, 56–68. doi:10.1038/nrg2918.
- 359 Barabási, A.-L., and Oltvai, Z. N. (2004). Network biology: understanding the cell's functional  
360 organization. *Nat. Rev. Genet.* 5, 101–113. doi:10.1038/nrg1272.

- 361 Basso, K., Margolin, A. A., Stolovitzky, G., Klein, U., Dalla-Favera, R., and Califano, A. (2005).  
362 Reverse engineering of regulatory networks in human B cells. *Nature Genetics* 37, 382–390.  
363 doi:10.1038/ng1532.
- 364 Chan, T. E., Stumpf, M. P. H., and Babbie, A. C. (2017). Gene Regulatory Network Inference from  
365 Single-Cell Data Using Multivariate Information Measures. *Cell Systems* 5, 251–267.e3.  
366 doi:10.1016/j.cels.2017.08.014.
- 367 Chawla, K., Tripathi, S., Thommesen, L., Lægreid, A., and Kuiper, M. (2013). TFcheckpoint: a  
368 curated compendium of specific DNA-binding RNA polymerase II transcription factors.  
369 *Bioinformatics* 29, 2519–2520. doi:10.1093/bioinformatics/btt432.
- 370 Chen, S., and Mar, J. C. (2018). Evaluating methods of inferring gene regulatory networks highlights  
371 their lack of performance for single cell gene expression data. *BMC bioinformatics* 19, 232.  
372 doi:10.1186/s12859-018-2217-z.
- 373 Fiers, M. W. E. J., Minnoye, L., Aibar, S., Bravo González-Blas, C., Kalender Atak, Z., and Aerts, S.  
374 (2018). Mapping gene regulatory networks from single-cell omics data. *Briefings in*  
375 *Functional Genomics* 17, 246–254. doi:10.1093/bfpg/elx046.
- 376 Greenfield, A., Madar, A., Ostrer, H., and Bonneau, R. (2010). DREAM4: Combining genetic and  
377 dynamic information to identify biological networks and dynamical models. *PloS One* 5,  
378 e13397. doi:10.1371/journal.pone.0013397.
- 379 Hay, S. B., Ferchen, K., Chetal, K., Grimes, H. L., and Salomonis, N. (2018). The Human Cell Atlas  
380 bone marrow single-cell interactive web portal. *Experimental Hematology* 68, 51–61.  
381 doi:10.1016/j.exphem.2018.09.004.
- 382 Huynh-Thu, V. A., Irrthum, A., Wehenkel, L., and Geurts, P. (2010). Inferring regulatory networks  
383 from expression data using tree-based methods. *PloS One* 5.  
384 doi:10.1371/journal.pone.0012776.
- 385 Ideker, T., and Sharan, R. (2008). Protein networks in disease. *Genome Research* 18, 644–652.  
386 doi:10.1101/gr.071852.107.
- 387 Kim, S. (2015). ppcor: An R Package for a Fast Calculation to Semi-partial Correlation Coefficients.  
388 *Communications for Statistical Applications and Methods* 22, 665–674.  
389 doi:10.5351/CSAM.2015.22.6.665.
- 390 Li, H., Courtois, E. T., Sengupta, D., Tan, Y., Chen, K. H., Goh, J. J. L., et al. (2017). Reference  
391 component analysis of single-cell transcriptomes elucidates cellular heterogeneity in human  
392 colorectal tumors. *Nat. Genet.* 49, 708–718. doi:10.1038/ng.3818.
- 393 Lukowski, S. W., Lo, C. Y., Sharov, A. A., Nguyen, Q., Fang, L., Hung, S. S., et al. (2019). A single-  
394 cell transcriptome atlas of the adult human retina. *EMBO J* 38.  
395 doi:10.15252/embj.2018100811.
- 396 Margolin, A. A., Nemenman, I., Basso, K., Wiggins, C., Stolovitzky, G., Dalla Favera, R., et al.  
397 (2006). ARACNE: an algorithm for the reconstruction of gene regulatory networks in a

- 398 mammalian cellular context. *BMC bioinformatics* 7 Suppl 1, S7. doi:10.1186/1471-2105-7-  
399 S1-S7.
- 400 Matsumoto, H., Kiryu, H., Furusawa, C., Ko, M. S. H., Ko, S. B. H., Gouda, N., et al. (2017).  
401 SCODE: an efficient regulatory network inference algorithm from single-cell RNA-Seq  
402 during differentiation. *Bioinformatics* 33, 2314–2321. doi:10.1093/bioinformatics/btx194.
- 403 Menon, M., Mohammadi, S., Davila-Velderrain, J., Goods, B. A., Cadwell, T. D., Xing, Y., et al.  
404 (2019). Single-cell transcriptomic atlas of the human retina identifies cell types associated  
405 with age-related macular degeneration. *Nat Commun* 10, 4902. doi:10.1038/s41467-019-  
406 12780-8.
- 407 Moerman, T., Aibar Santos, S., Bravo González-Blas, C., Simm, J., Moreau, Y., Aerts, J., et al.  
408 (2019). GRNBoost2 and Arboreto: efficient and scalable inference of gene regulatory  
409 networks. *Bioinformatics (Oxford, England)* 35, 2159–2161.  
410 doi:10.1093/bioinformatics/bty916.
- 411 Pratapa, A., Jalihal, A. P., Law, J. N., Bharadwaj, A., and Murali, T. M. (2020). Benchmarking  
412 algorithms for gene regulatory network inference from single-cell transcriptomic data. *Nat.*  
413 *Methods* 17, 147–154. doi:10.1038/s41592-019-0690-6.
- 414 Setty, M., Kiseliovas, V., Levine, J., Gayoso, A., Mazutis, L., and Pe’er, D. (2019). Characterization  
415 of cell fate probabilities in single-cell data with Palantir. *Nat Biotechnol* 37, 451–460.  
416 doi:10.1038/s41587-019-0068-4.
- 417 Silverman, E. K., Schmidt, H. H. H. W., Anastasiadou, E., Altucci, L., Angelini, M., Badimon, L., et  
418 al. (2020). Molecular networks in Network Medicine: Development and applications. *Wiley*  
419 *Interdisciplinary Reviews. Systems Biology and Medicine*, e1489. doi:10.1002/wsbm.1489.
- 420 Sonawane, A. R., Weiss, S. T., Glass, K., and Sharma, A. (2019). Network Medicine in the Age of  
421 Biomedical Big Data. *Frontiers in Genetics* 10, 294. doi:10.3389/fgene.2019.00294.
- 422 Tantardini, M., Ieva, F., Tajoli, L., and Piccardi, C. (2019). Comparing methods for comparing  
423 networks. *Scientific Reports* 9, 17557. doi:10.1038/s41598-019-53708-y.
- 424 Verny, L., Sella, N., Affeldt, S., Singh, P. P., and Isambert, H. (2017). Learning causal networks with  
425 latent variables from multivariate information in genomic data. *PLoS Comput Biol* 13,  
426 e1005662. doi:10.1371/journal.pcbi.1005662.
- 427 Zhang, Y., Zheng, L., Zhang, L., Hu, X., Ren, X., and Zhang, Z. (2019). Deep single-cell RNA  
428 sequencing data of individual T cells from treatment-naïve colorectal cancer patients. *Sci*  
429 *Data* 6, 131. doi:10.1038/s41597-019-0131-5.

430

431

432

433 **Tables**

434 **Table1. Datasets employed in this benchmark**

| Data Name | Biological context  | Sequencing technology | Number of cells                 | Cell type annotation strategy         | Associated publication  | Number of genes after preprocessing |
|-----------|---------------------|-----------------------|---------------------------------|---------------------------------------|-------------------------|-------------------------------------|
| Menon     | Human retina        | 10X Genomics          | 20,091                          | manually curated marker genes         | (Menon et al., 2019)    | 6212                                |
| Lukowski  | Human retina        | 10X Genomics          | 20,009                          | no annotation                         | (Lukowski et al., 2019) | 6212                                |
| Zhang     | CRC T-cells         | Smart-Seq2,           | 10,805                          | FACS sorted                           | (Zhang et al., 2019)    | 11242                               |
| Li        | CRC T-cells         | HiSeq 2000 Illumina   | 375 cells (of which 35 T-cells) | manually curated marker genes         | (Li et al., 2017)       | 11242                               |
| Hay       | human hematopoiesis | 10X Genomics          | 101,935                         | MarkerFinder ICGS                     | (Hay et al., 2018)      | 7038                                |
| Setty     | human hematopoiesis | 10X Genomics          | 12,046                          | Sorted bulk hematopoietic populations | (Setty et al., 2019)    | 7038                                |

435

436 **Figures Legends**

437 **Figure 1. Summary of the workflow followed in this benchmark.**

438

439 **Figure 2. Reproducibility performances of the various network inference algorithms across the**  
 440 **three biological contexts: human retina, colorectal cancer T-cells and human hematopoiesis.** A  
 441 and B report summarise the Percentage of intersection (perINT), Weighted Jaccard Similarity (WJS)  
 442 and RcisTarget score obtained by the benchmarked algorithms (GRNBoost2, GENIE3 and PPCOR)  
 443 in human retina and colorectal cancer T-cells respectively. C-E summarize the performances of the  
 444 same algorithms in hematopoiesis, with perINT (in C), WJS (in D) and RcisTarget score (in E).

445

446 **Figure 3. perINT and WJS according to different network thresholding.** The perINT and WJS  
 447 are here reported for varying thresholds on the weight distribution of the links of the inferred  
 448 networks. THE results are reported for all the tested datasets (A) retina, (B) CRC T-cells, (C ) CLPs,  
 449 (D) Dendritic cells, (E) Erythrocytes, (F) HSCs, (G) Monocytes.

450

451 **Figure 4. Stability of the network inference performances with respect to technical variations in**  
 452 **the input data.** Reproducibility scores of GRENBoost2 (red), GENIE3 (black) and PPCOR (yellow)  
 453 across different splittings of the Menon, M. et al. retina dataset. A and B correspond to the percentage  
 454 of intersection (perINT) and Weighted Jaccard Similarity (WJS), respectively.

455

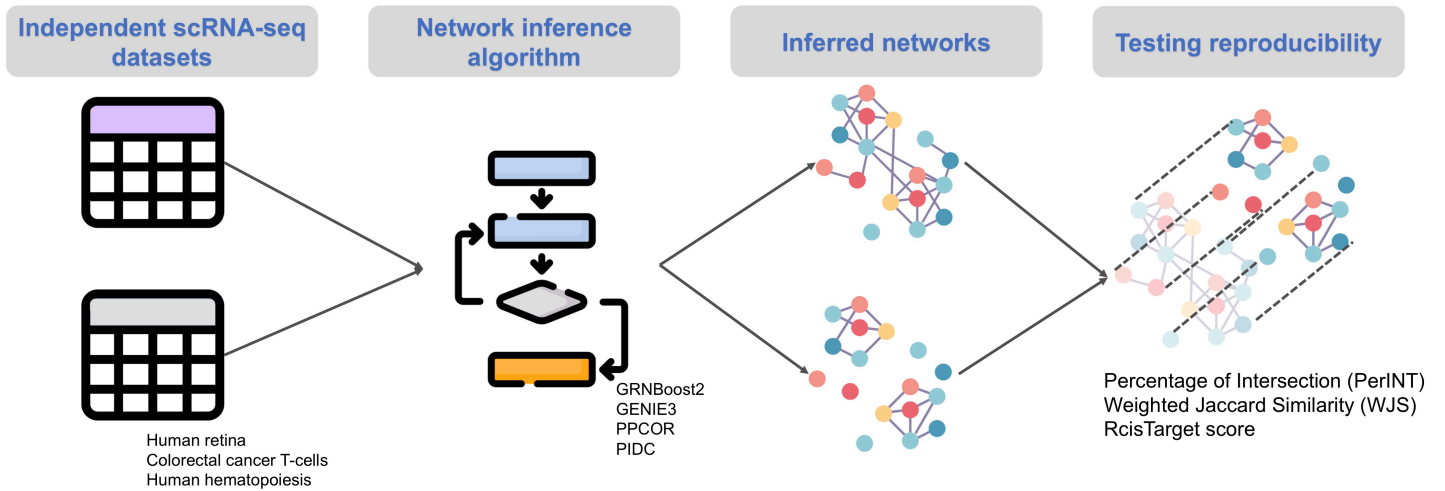



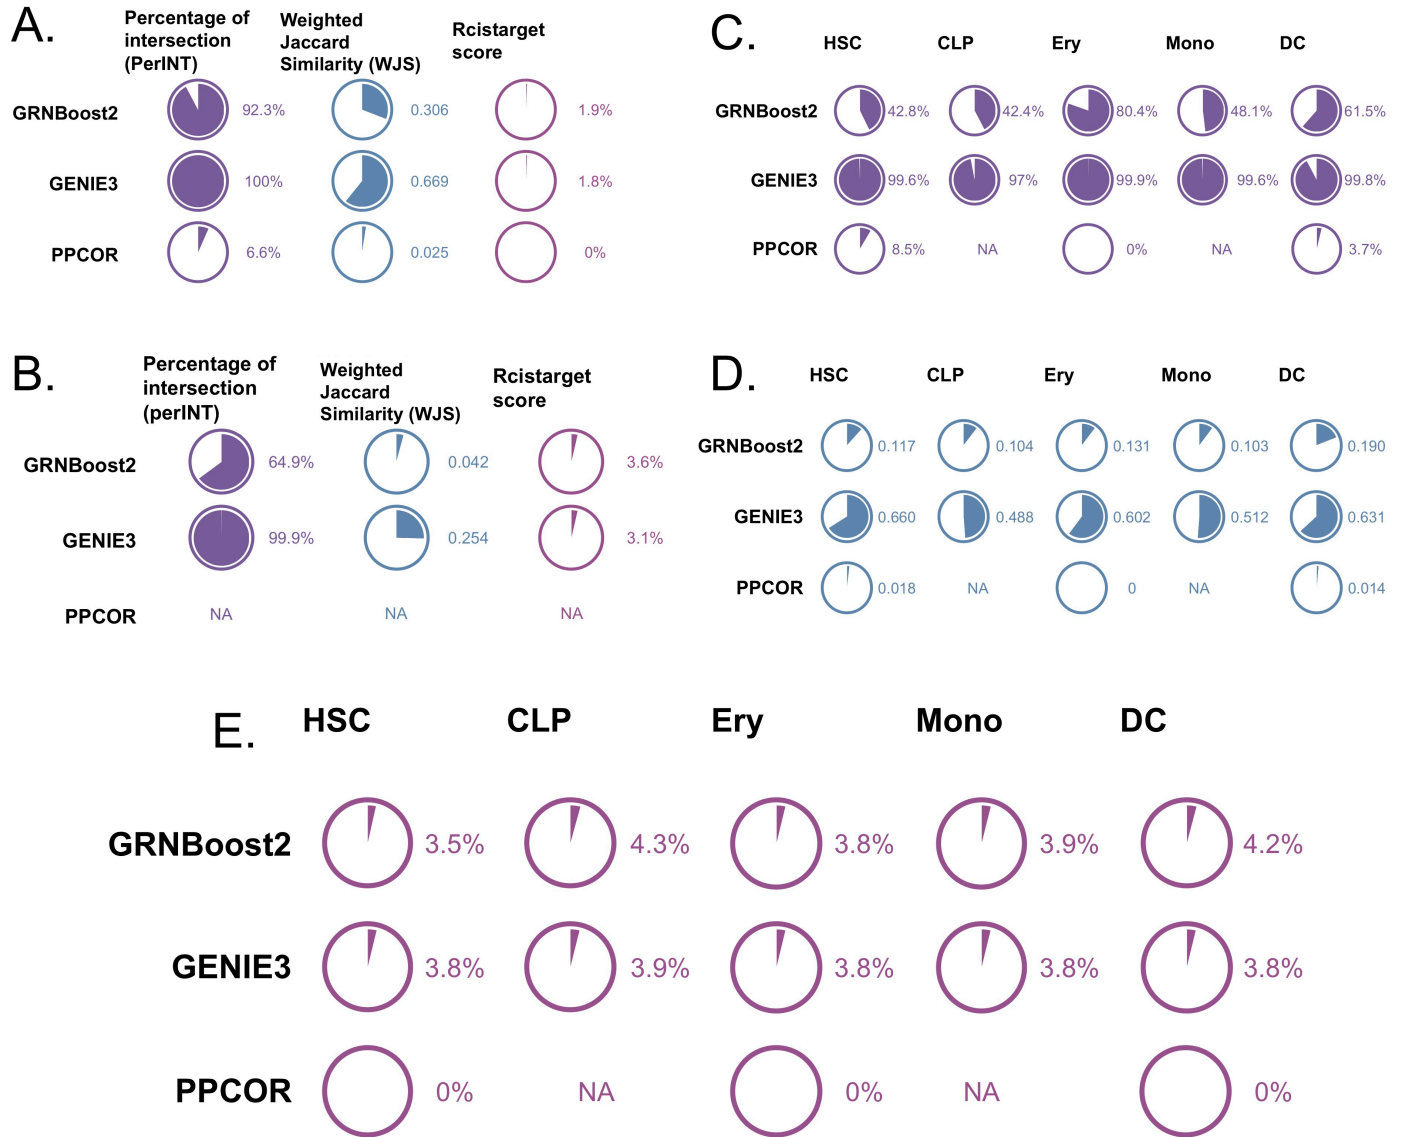

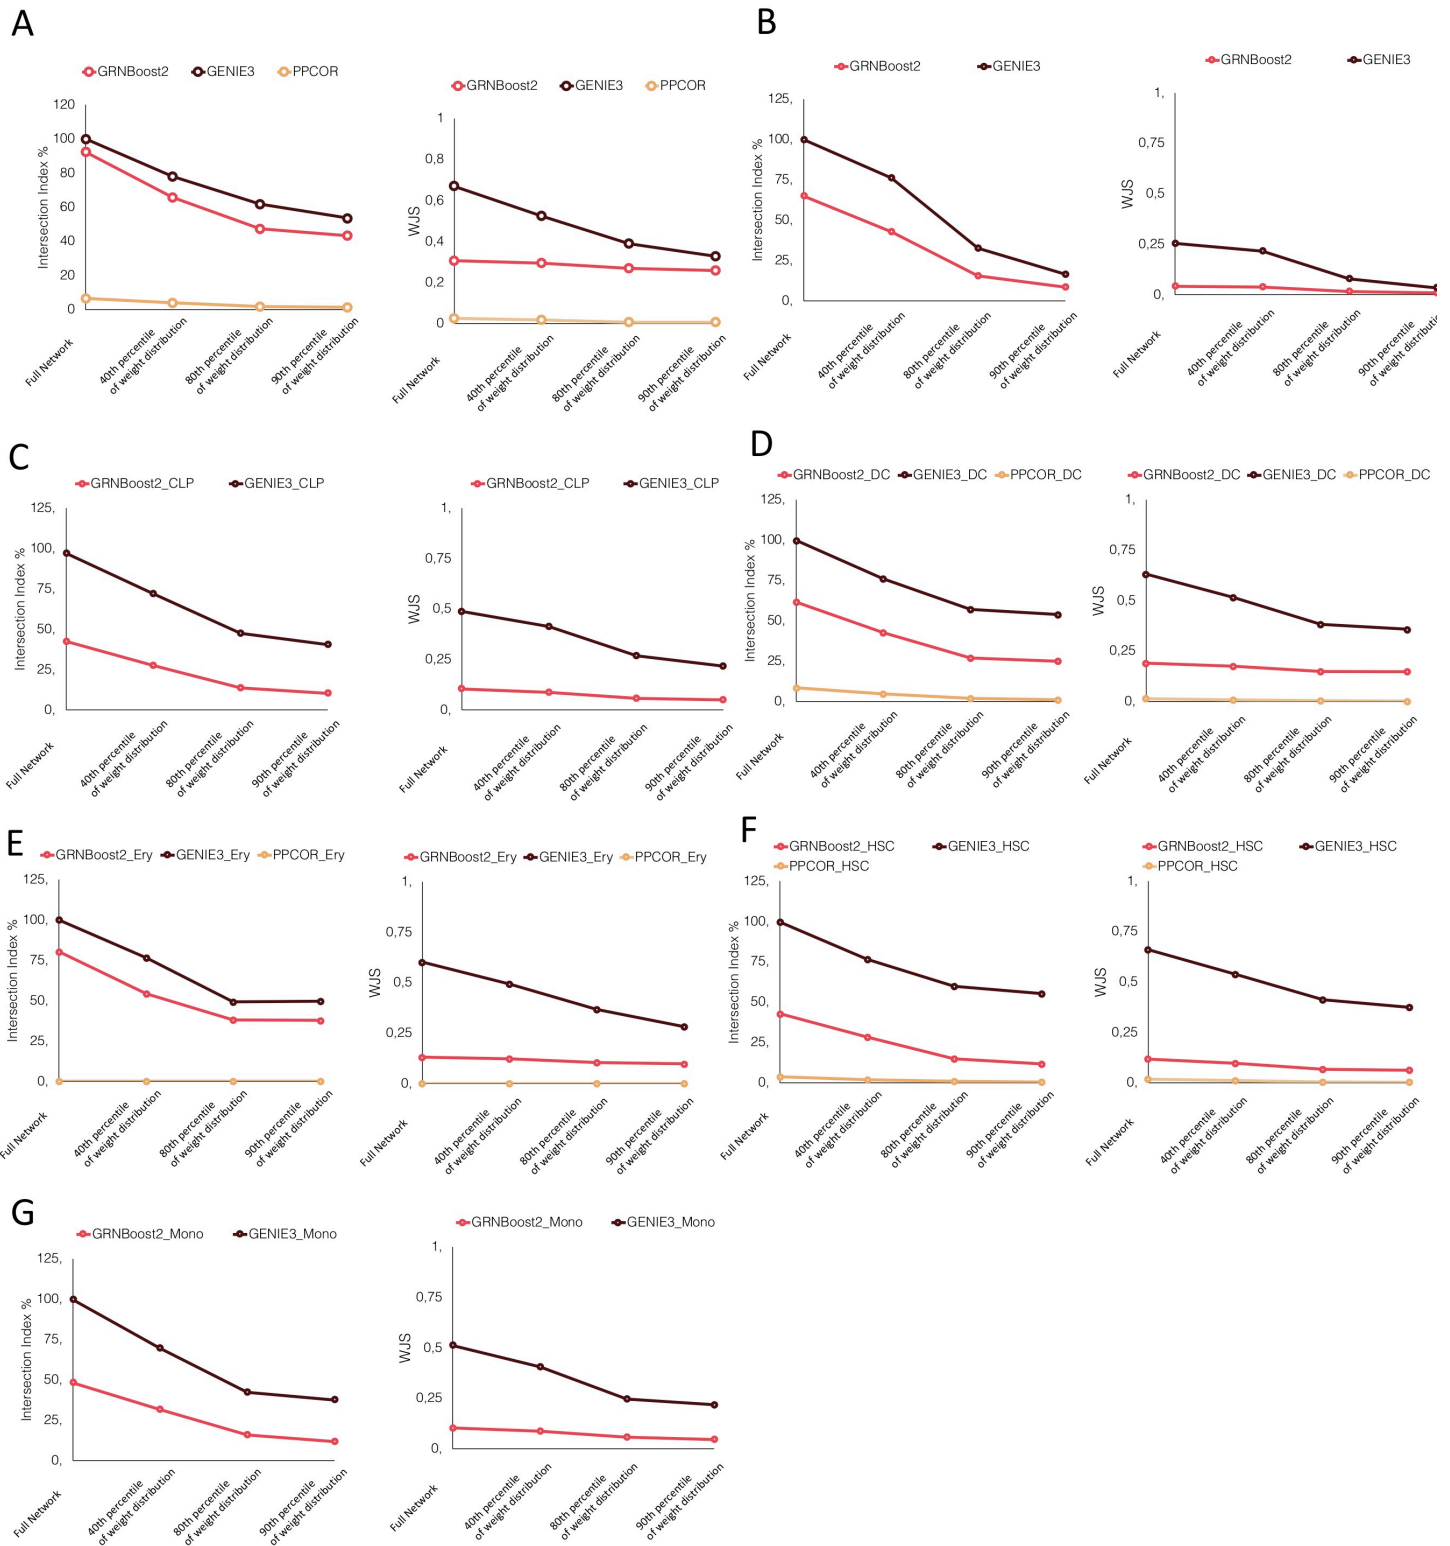

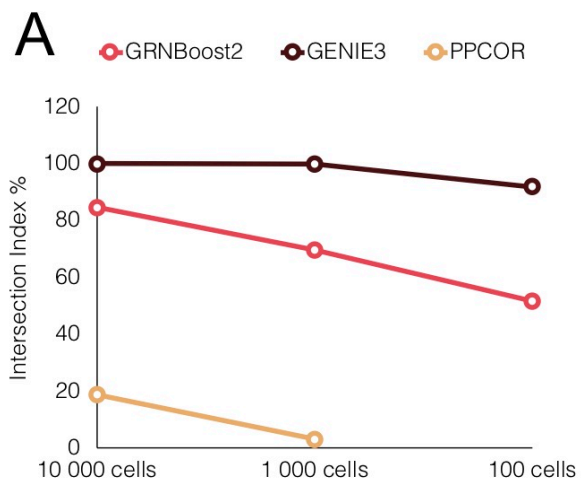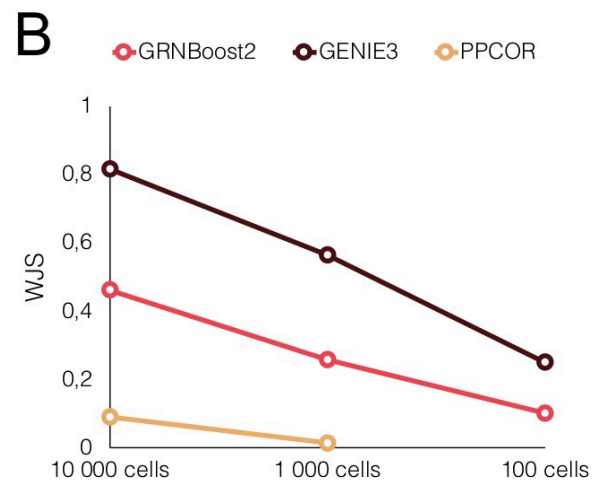

## Supplementary Material

### 1 Supplementary Tables

| <b>Supplementary Table 1. Number of links in the various inferred networks.</b> |                  |                        |
|---------------------------------------------------------------------------------|------------------|------------------------|
| <b>Data Name</b>                                                                | <b>Algorithm</b> | <b>Number of links</b> |
| Menon et al.                                                                    | PPCOR            | 598539                 |
|                                                                                 | GENIE3           | 1552750                |
|                                                                                 | GRNBoost2        | 1421357                |
| Lukowski et al.                                                                 | PPCOR            | 1184848                |
|                                                                                 | GENIE3           | 1552750                |
|                                                                                 | GRNBoost2        | 1355892                |
| Zhang et al.                                                                    | PPCOR            | 1237822                |
|                                                                                 | GENIE3           | 5833037                |
|                                                                                 | GRNBoost2        | 3006644                |
| Li et al.                                                                       | PPCOR            | NA                     |
|                                                                                 | GENIE3           | 2950874                |
|                                                                                 | GRNBoost2        | 765846                 |
| Hay et al. HSC                                                                  | PPCOR            | 571935                 |
|                                                                                 | GENIE3           | 2448676                |
|                                                                                 | GRNBoost2        | 801816                 |
| Hay et al. CLP                                                                  | PPCOR            | NA                     |
|                                                                                 | GENIE3           | 2321809                |
|                                                                                 | GRNBoost2        | 764244                 |
| Hay et al. Monocytes                                                            | PPCOR            | NA                     |
|                                                                                 | GENIE3           | 2418779                |
|                                                                                 | GRNBoost2        | 799381                 |
| Hay et al. Erythroblast                                                         | PPCOR            | 761300                 |
|                                                                                 | GENIE3           | 2461623                |
|                                                                                 | GRNBoost2        | 1787691                |
| Hay et al. Dendritic Cell                                                       | PPCOR            | 1703169                |
|                                                                                 | GENIE3           | 2453534                |
|                                                                                 | GRNBoost2        | 1184762                |
| Setty et al. HSC                                                                | PPCOR            | 566853                 |
|                                                                                 | GENIE3           | 2447457                |
|                                                                                 | GRNBoost2        | 726544                 |
| Setty et al. CLP                                                                | PPCOR            | NA                     |
|                                                                                 | GENIE3           | 2332534                |
|                                                                                 | GRNBoost2        | 607112                 |
| Setty et al. Monocytes                                                          | PPCOR            | 514936                 |
|                                                                                 | GENIE3           | 2452913                |
|                                                                                 | GRNBoost2        | 962318                 |
| Setty et al. Erythroblast                                                       | PPCOR            | 249941                 |
|                                                                                 | GENIE3           | 2448696                |
|                                                                                 | GRNBoost2        | 1143651                |
| Setty et al. Dendritic Cell                                                     | PPCOR            | 360772                 |
|                                                                                 | GENIE3           | 2457673                |
|                                                                                 | GRNBoost2        | 1265417                |

**Supplementary Table 2.** P-values null model. The perINT index of our experiments are here compared in respect to the distribution of perINT indexes obtained over 1000 random reshufflings of the networks. The value  $\leq 0.001$  correspond to a zero over 1000 runs, which indicates a P-value lower than 0.001.

| Data Name                                  | Algorithm | P-value null model |
|--------------------------------------------|-----------|--------------------|
| Retina Manon et al and Lukowski et al.     | PPCOR     | 0.176              |
|                                            | GENIE3    | $\leq 0.001$       |
|                                            | GRNBoost2 | $\leq 0.001$       |
| CRC T-cells Zhang et al. and Li et al.     | PPCOR     | NA                 |
|                                            | GENIE3    | $\leq 0.001$       |
|                                            | GRNBoost2 | $\leq 0.001$       |
| HSC Hay et al. and Setty et al.            | PPCOR     | NA                 |
|                                            | GENIE3    | $\leq 0.001$       |
|                                            | GRNBoost2 | $\leq 0.001$       |
| CLP Hay et al. and Setty et al.            | PPCOR     | NA                 |
|                                            | GENIE3    | $\leq 0.001$       |
|                                            | GRNBoost2 | $\leq 0.001$       |
| Monocytes Hay et al. and Setty et al.      | PPCOR     | NA                 |
|                                            | GENIE3    | $\leq 0.001$       |
|                                            | GRNBoost2 | $\leq 0.001$       |
| Erythroblast Hay et al. And Setty et al.   | PPCOR     | NA                 |
|                                            | GENIE3    | $\leq 0.001$       |
|                                            | GRNBoost2 | $\leq 0.001$       |
| Dendritic Cell Hay et al. and Setty et al. | PPCOR     | NA                 |
|                                            | GENIE3    | $\leq 0.001$       |
|                                            | GRNBoost2 | $\leq 0.001$       |

**Supplementary Table 3.** Number of links obtained for different subsamplings of the human retina dataset (Menon et al., 2019)

| Number of cells in subsampling | Algorithm | Number of links dataset 1 | Number of links dataset 2 |
|--------------------------------|-----------|---------------------------|---------------------------|
| 10000                          | PPCOR     | 4963433                   | 4966521                   |
|                                | GENIE3    | 2417821                   | 2417821                   |
|                                | GRNBoost2 | 1959586                   | 1971026                   |
| 1000                           | PPCOR     | 645320                    | 646830                    |
|                                | GENIE3    | 2417602                   | 2417653                   |
|                                | GRNBoost2 | 1462312                   | 1391567                   |
| 100                            | PPCOR     | NA                        | NA                        |
|                                | GENIE3    | 1987003                   | 2157024                   |
|                                | GRNBoost2 | 666438                    | 959804                    |
